# Supplementary material
Source: Royal Society of Chemistry journal article supplement (doi:10.1039/d6ta02854c)
Supplement: d6ta02854c1.pdf [file d6ta02854c1.pdf]

## Supporting Information

### Synergistic DFT and Machine Learning Screening of Z-Scheme g-SiC/TMD Heterostructures for Efficient Overall Water Splitting

Wenxue Zhang<sup>a</sup>, Yu Jiang<sup>a</sup>, Jiuran Wen<sup>a</sup>, Yajie Guo<sup>a</sup>, Cheng He<sup>b\*</sup>

<sup>a</sup> School of Materials Science and Engineering, Chang'an University, Xi'an 710064, China

<sup>b</sup> State Key Laboratory for Mechanical Behavior of Materials, School of Materials Science and Engineering, Xi'an Jiaotong University, Xi'an 710049, China

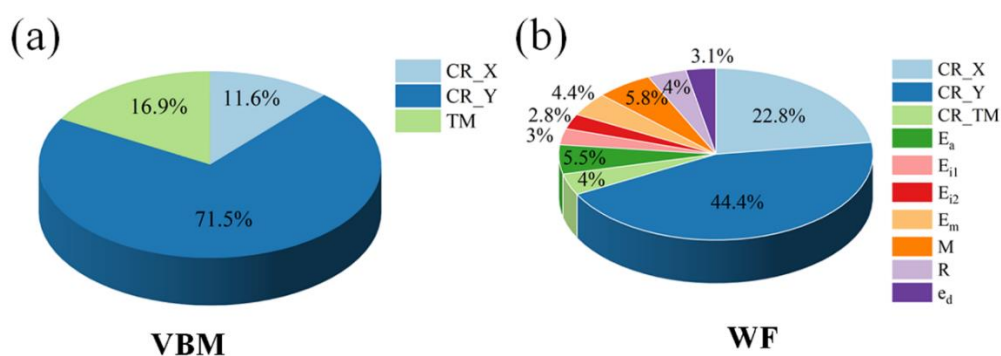

Figure S1. Feature importance associated with a) VBM and b) WF.

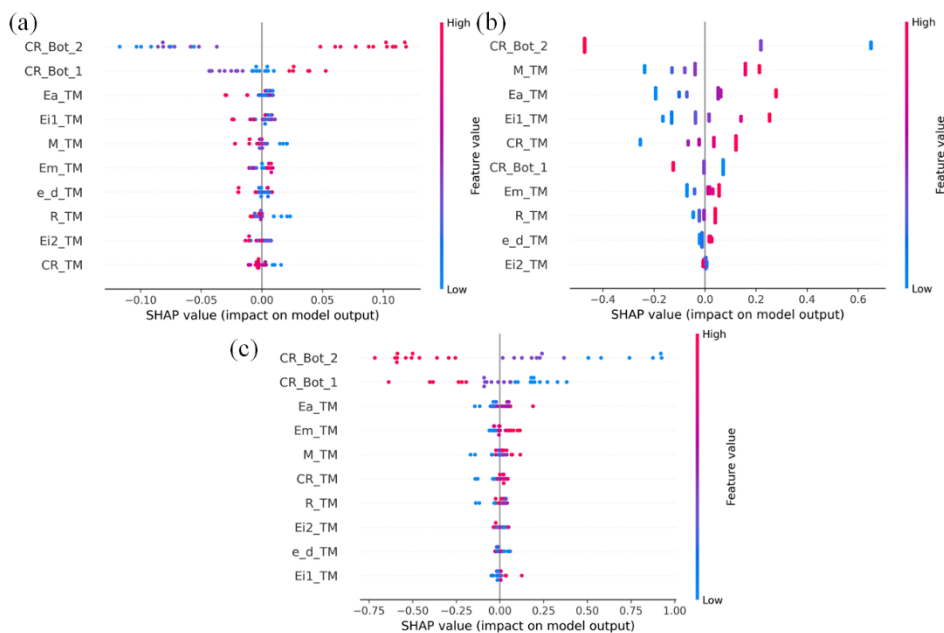

Figure S2. SHAP analysis plots of the selected features for the VBM (a), CBM (b), and WF (c) models. (CR\_Bot\_1 is CR\_X; CR\_Bot\_2 is CR\_Y)

\*Corresponding Authors: Cheng He (hecheng@mail.xjtu.edu.cn)

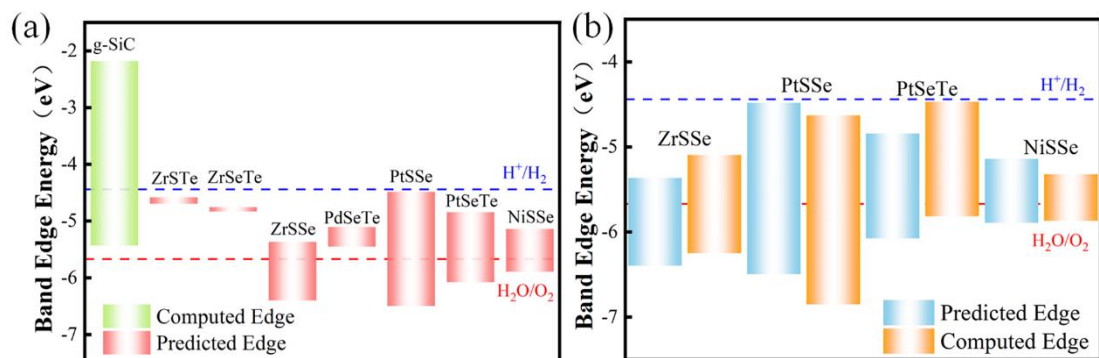

Figure S3. a) DFT-calculated band edge positions of g-SiC aligned with the ML-predicted band edge positions of some 1T-TMD monolayers. b) Comparison between the ML-predicted and DFT-calculated band edge positions for some 1T-TMD monolayers.

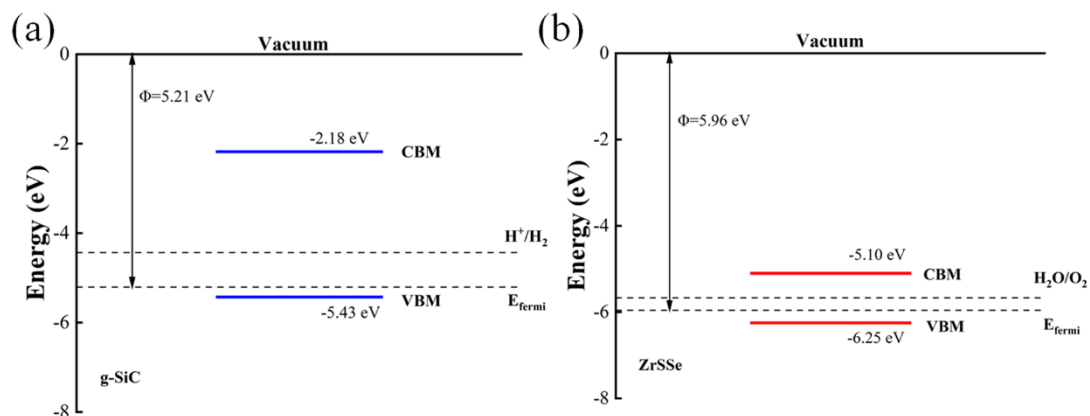

Figure S4. Band edge positions of a) g-SiC monolayer and b) ZrSSe monolayer.

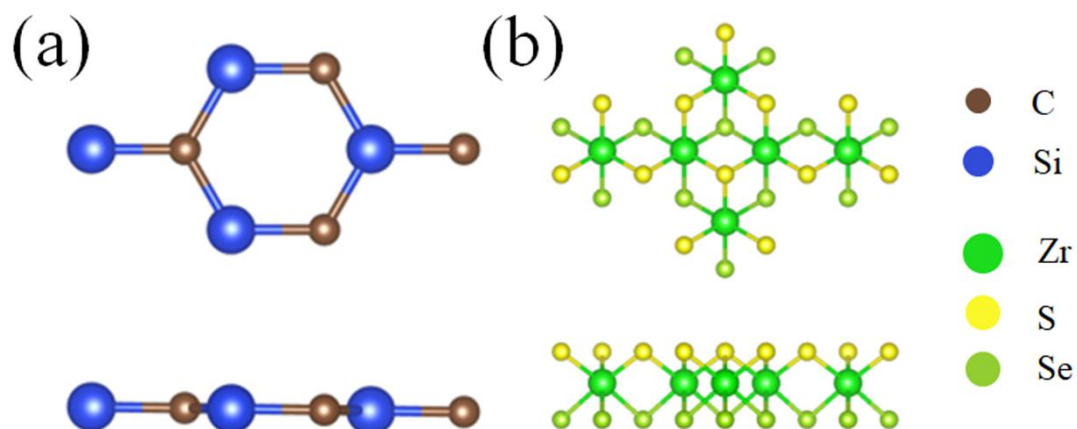

Figure S5. Schematic illustrations of the atomic structures for a) g-SiC monolayer and b) ZrSSe monolayer.

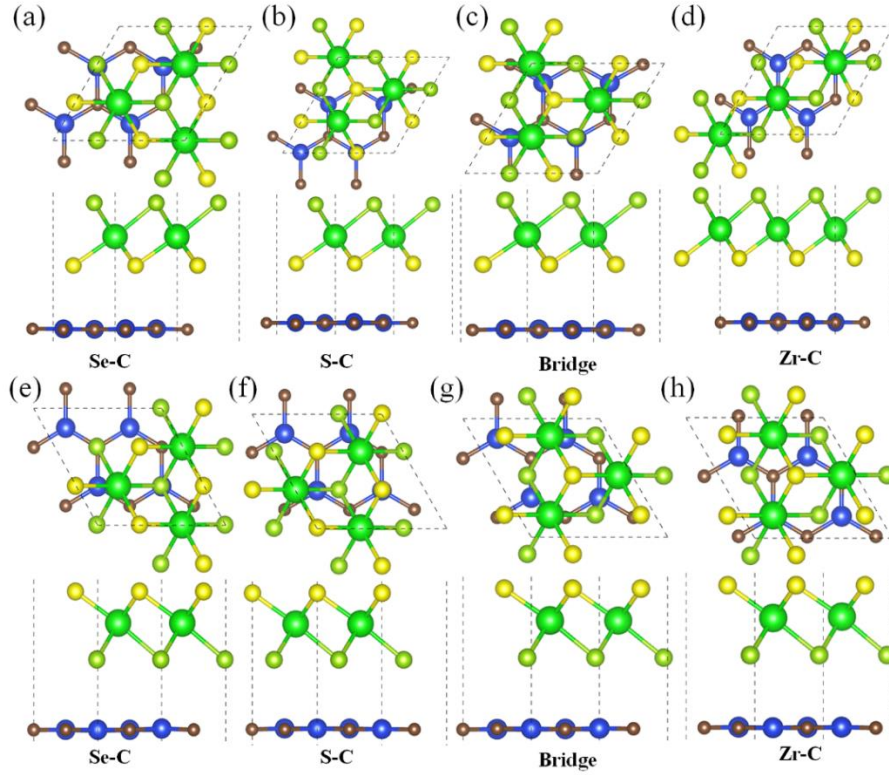

Figure S6. Schematic illustrations of the heterostructures. Se-C (a), S-C (b), Bridge (c), and Zr-C (d) stacking configurations of the g-SiC/SZrSe heterojunction. Se-C (e), S-C (f), Bridge (g), and Zr-C (h) stacking configurations of the g-SiC/SeZrS heterojunction.

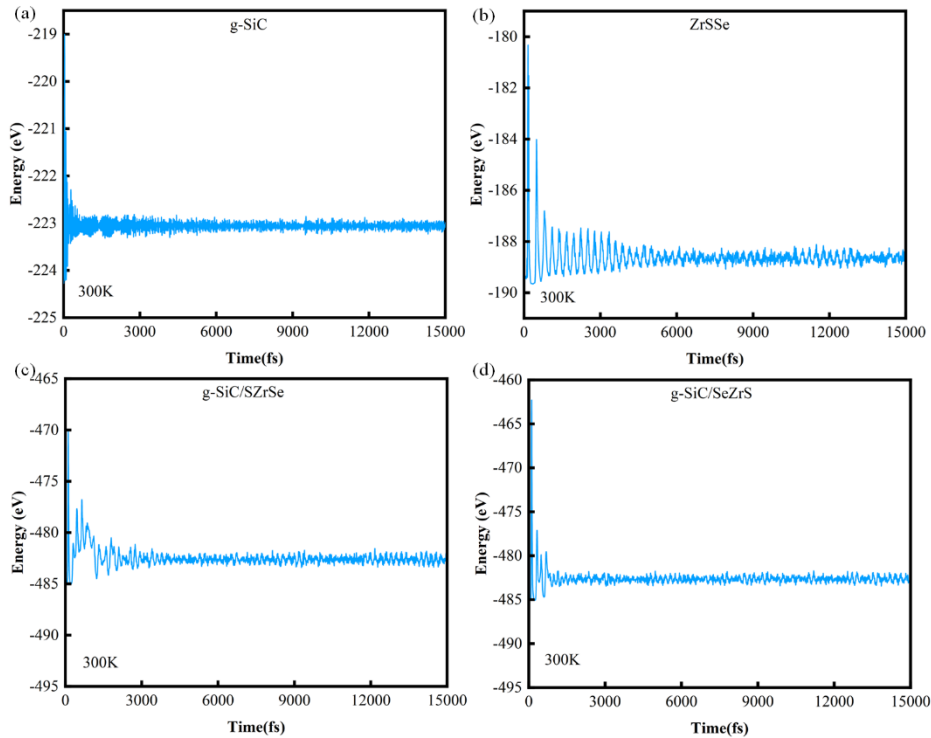

Figure S7. Figure 8. Ab initio molecular dynamics (AIMD) simulations of g-SiC (a), ZrSSe (b), g-SiC/SZrSe (c) and g-SiC/SeZrS (d)

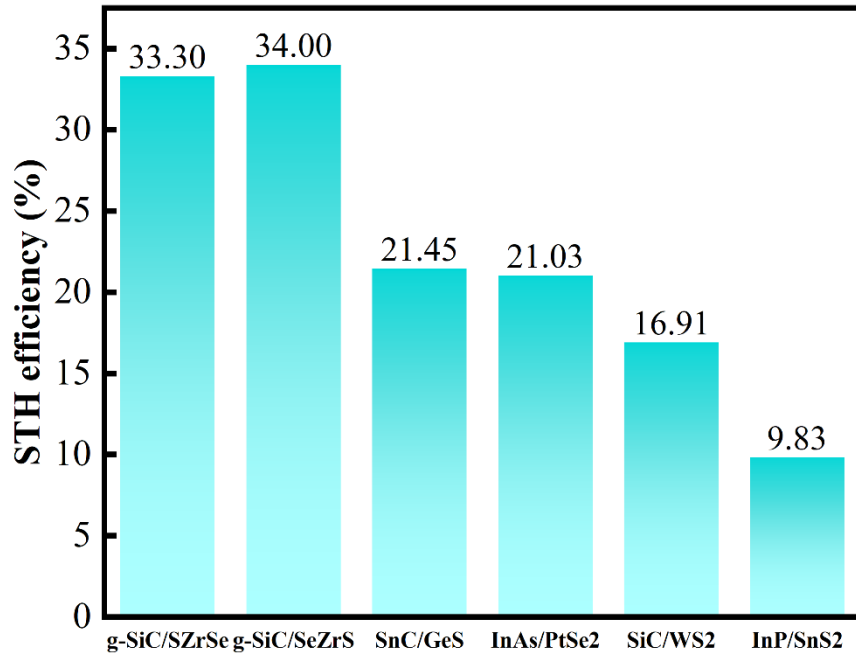

Figure S8. Comparison of the STH efficiencies of g-SiC/SZrSe and g-SiC/SeZrS heterojunctions with those of other reported heterojunctions.[1-4]

Table S1. The CBM, VBM, and WF values of 26 types of 1T-TMDs.

| Materials         | CBM (eV) | VBM (eV) | WF (eV) |
|-------------------|----------|----------|---------|
| PdTe <sub>2</sub> | 0.1360   | -0.1193  | 4.490   |
| PdS <sub>2</sub>  | 1.5116   | -0.2446  | 6.483   |
| PdSe <sub>2</sub> | 0.7920   | -0.2386  | 5.494   |
| HfSSe             | 1.3676   | -0.2069  | 6.102   |
| HfS <sub>2</sub>  | 1.5497   | -0.3384  | 6.627   |
| HfSe <sub>2</sub> | 0.6715   | -0.3256  | 5.542   |
| HfTe <sub>2</sub> | 0.0112   | -0.0001  | 4.668   |
| HfSeTe            | 0.0625   | -0.0522  | 4.725   |
| HfSTe             | 0.0558   | -0.0470  | 4.582   |
| ZrS <sub>2</sub>  | 1.4724   | -0.3141  | 6.699   |
| ZrSe <sub>2</sub> | 0.4744   | -0.3630  | 5.686   |
| ZrTe <sub>2</sub> | 0.0214   | -0.0033  | 4.783   |
| PtTe <sub>2</sub> | 0.6708   | -0.2519  | 4.641   |
| PtS <sub>2</sub>  | 2.3626   | -0.2800  | 6.779   |
| PtSe <sub>2</sub> | 1.5726   | -0.2782  | 5.809   |
| PtSTe             | 1.1280   | -0.2510  | 6.322   |
| SnS <sub>2</sub>  | 2.1252   | -0.2643  | 7.084   |
| SnSe <sub>2</sub> | 1.0514   | -0.3020  | 6.161   |
| SnTe <sub>2</sub> | 0.0238   | -0.0100  | 5.122   |
| SnSSe             | 1.2484   | -0.2615  | 6.353   |
| SnSTe             | 0.0056   | -0.0020  | 5.162   |
| SnSeTe            | 0.1205   | -0.1160  | 5.526   |
| NiS <sub>2</sub>  | 0.6820   | -0.2197  | 5.729   |

| Materials | CBM (eV) | VBM (eV) | WF (eV) |
|-----------|----------|----------|---------|
| NiSe2     | 0.1722   | -0.1593  | 4.968   |
| NiTe2     | 0.0126   | -0.0262  | 4.600   |
| NiSeTe    | 0.0098   | -0.0060  | 5.391   |

Table S2. ML-predicted data of the test set.

| Materials | CBM     | VBM     | WF    |
|-----------|---------|---------|-------|
| ZrSTe     | 0.0469  | -0.0650 | 4.630 |
| ZrSeTe    | -0.0283 | -0.1083 | 4.725 |
| PdSeTe    | 0.2033  | -0.1411 | 5.308 |
| PtSSe     | 1.7438  | -0.2689 | 6.228 |

Table S3. DFT-computed data of the test set.

| Materials | CBM    | VBM     | WF    |
|-----------|--------|---------|-------|
| ZrSTe     | 0.0781 | -0.0615 | 4.729 |
| ZrSeTe    | 0.0081 | -0.1242 | 4.809 |
| PdSeTe    | 0.3616 | -0.2570 | 5.326 |
| PtSSe     | 1.9275 | -0.294  | 6.556 |

Table S4. ML-predicted values and DFT-calculated values of CBM, VBM, and WF.

|                            | CBM    | VBM     | WF    |
|----------------------------|--------|---------|-------|
| ML-predicted values (eV)   | 0.7372 | -0.2937 | 6.102 |
| DFT-calculated values (eV) | 0.8639 | -0.2893 | 5.959 |

Table S5. The interlayer distances of g-SiC/SZrSe and g-SiC/SeZrS heterostructures.

| heterostructures | Se-C (Å) | S-C (Å) | Bridge (Å) | Zr-C (Å) |
|------------------|----------|---------|------------|----------|
| g-SiC/SZrSe      | 3.1799   | 3.1744  | 3.1730     | 3.2006   |
| g-SiC/SeZrS      | 3.1752   | 3.2333  | 3.2462     | 3.2427   |

The optical absorption coefficient ( $\alpha(\omega)$ ) can be expressed as:[5]

$$\alpha(\omega) = \sqrt{2}\omega \left[ \sqrt{\varepsilon_1^2(\omega) + \varepsilon_2^2(\omega)} - \varepsilon_1(\omega) \right]^{\frac{1}{2}} \quad (1)$$

where  $\omega$  represents the frequency of the incident light, and  $\varepsilon_1$  and  $\varepsilon_2$  correspond to the real and imaginary parts of the derived complex dielectric function, respectively.

The STH efficiency can be calculated via the equation below:[6]

$$\eta_{STH} = 0.5 \times \frac{\Delta G \int_E^{\infty} \frac{P(\hbar\omega)}{\hbar\omega} d(\hbar\omega)}{\int_0^{\infty} P(\hbar\omega) d(\hbar\omega)} \quad (2)$$

where E is the bandgap of the material,  $\Delta G$  is the potential difference of 1.23 eV for water splitting, and  $P(\hbar\omega)$  is the AM1.5 solar energy flux at the photon energy  $\hbar\omega$ . The factor of 0.5 accounts for the fact that in the context of photocatalytic water splitting,

only half of the photogenerated carriers are converted into hydrogen energy.

## References

- [1] D. Li, W. Luo, X. Wei, Y. Zhang, Y. Yang, J. Liu, Y. Tian, L. Duan, Hydrogen production from photocatalytic water splitting in the InP/SnS<sub>2</sub> heterojunction: First-principles calculations, *Chem. Phys.*, 598 (2025) 112840.
- [2] L. Feng, Q. Xiao, S. Li, F. Ai, L. Zhang, J. Ye, Q. Xie, First-principles study on SnC/GeS heterojunction as A direct Z-scheme photocatalyst for water splitting, *Int. J. Hydrogen Energy*, 193 (2025) 152393.
- [3] D.D. Cheng, Y. Zhang, Y.Y. Jia, H.R. Zhu, Y.D. Feng, L. Duan, First-principles prediction of a novel 2D InAs/PtSe<sub>2</sub> direct Z-scheme van der Waals heterojunction for overall water-splitting, *Surf Sci.*, 761 (2025) 122798.
- [4] J. Ren, J. Zhang, B. Tian, Z. Pan, S. Wang, H. Chen, K. He, H. Zhong, Q. Wang, First-principles study of the electronic, optical adsorption, and photocatalytic water-splitting properties of a strain-tuned SiC/WS<sub>2</sub> heterojunction, *Int. J. Hydrogen Energy*, 87 (2024) 554-565.
- [5] X. Huang, T.R. Paudel, S. Dong, E.Y. Tsymbal, Hexagonal rare-earth manganites as promising photovoltaics and light polarizers, *PHYS REV B*, 92 (2015) 125201.
- [6] C.-F. Fu, J. Sun, Q. Luo, X. Li, W. Hu, J. Yang, Intrinsic Electric Fields in Two-dimensional Materials Boost the Solar-to-Hydrogen Efficiency for Photocatalytic Water Splitting, *Nano Lett.*, 18 (2018) 6312-6317.
